# Supplementary material for: Co-Developed Indigenous Educational Materials for Chronic Kidney Disease: A Scoping Review
Source: PubMed Central journal article supplement — Can J Kidney Health Dis. 2020 May 4;7:2054358120916394. doi: 10.1177/2054358120916394 (PMC7218329; doi:10.1177/2054358120916394), 2020-05-04
Supplement: Appendix_A__Medline_Search_Strategy.pdf [file Appendix_A__Medline_Search_Strategy.pdf]

## Appendix A Medline Search Strategy

1. exp American Native Continental Ancestry Group/
2. Oceanic Ancestry Group/
3. ("torres strait\*" or "American Indian" or Metis or Inuit or Maori or Eskimo\* or Greenlandic or Inupiat\* or Inuvialuit\* or Kalaallit\* or Mapuche\* or Navaho\* or nunangat\* or Skolt\* or Taiga\* or Yuit or Yupik or Zuni or Sami).tw.
4. (Algonqu\* or Atikamek\* or Athapaskan or Blackfoot or carrier or chilcotin or Chipewyan or Couteau or cree or Dene\* or Dakota or Dogrib or Gitskan or Haida or Haisla-Henaksiala or Hare or Inuinnagtun or Inuk\* or iroquois\* or Isolates or Ktunaxa or Kutchin\* or Kutenai\* or Kwakwaka'wakw or Kwakiutl or Loucheux or Malecite or Micma\* or Mohawk or Nass-Gitksan or "north slave\*" or nsilxcin or Nuu-chah-nulth or Okanagan or Ojibwe or Oji-Cree or Oneida or polynesi\* or Salish or Secwepemc or Shuswap or Siouan or Sioux or "South Slave\*" or Tlingit or Tsimshian or Nlakapamu\* or Wakashan or Xaadas).tw.
5. ("Salt River Pima-Maricopa" or "Gila River" or "Ak-Chin").tw.
6. (Saulteaux or Chehalis or Kitwanga or Iskut or Kuyukot or Kanaka or Clo-oose or Nicomen or Keremos or Matsqui or Tahsis or Gitwinkshilkw or Osoyoos or Popkum or Sechelt or Skookumchuk or Siska or Barriere or Spuzzum or Sumas or Saanichton or Tsawwassen or Ucluelet or Quadra or Duneza or Dakelh or Babine or Wetsuweten or Stolo or Staulo or Stahlo or "Fraser River Indians" or Kaska\* or Kootenay or Kwakwaka'wakw or Git\* or Gwitch\* or Musqueam or St'at'imc or In-shuck-ch or Lil'wat or Lillooet or Nisga\* or Nootka or Nuxalk or Sekani or Wuikinuxv or Secwepemc or Sinixt or Skwxwu7mesh or Tagish or Tahitan or Tahltan or Haisla or Nicola or Kitimat or Beaver or Tsilhqot'in or Cowichan or Tsetsaut or Oweekeno or Heiltsuk or "Bella Bella" or "Bella Coola" or Squamish or Stlatl\* or Slatemuk or Dane-zaa or Tsattine or Tutchone\* or Tutchone or Akisq'nuk or Esdilagh or "Acho Dene Koe" or Ahousaht or Aitchelitz or Tseil-Waututh or Burrard or Cacli'p or Cheam or Chawathil or Aishihi or Chemainus or Comox or Da'naxda'xw or Ditidaht or Dzawada'enuxw or Ehatesaht or Esketemc or Esquimalt or Gitan\* or Git\* or Glen Vowell or Gwa'sala or Gwawaenuk or Hagwilget or Halalt or Halq'emeylem or Hesquiaht or Homalco or Hupacasath or Hul'quimi'num or Ka:'yu:'k't'h or Che:k'tles7et'h or Katzie or Kispiox or Kitselas or Kitsumlamun or Klahoos or Kluskus or Lhoosk'uz or K'omoks or Kwadacha or Kwaw-kwaw-a-pilt or Kwiakah or Kwicksutaineuk or Kwikwentlem or Lakahahmen or Lax-kw'alaams or Leq'a:mel or Lheidli-T'enneh or Lhatko or Lyackson or Malahat or Mamalilikulla or Metalakatla or Mowachaht or Muchalaht or Nadleh or Nak'azdli or 'Namgis or Sununeymuxw or Nanoos or Nazko or Nee-Tahi-Buhn or Neskonlith or Nooaitch or N'quatqua or Ostlq'emeylem or Pacheedath or Pauquachin or Penelakut or Qayqayt or Quatsino or Saik'uz or Samahquam or Scowlitz or

Semiahmoo or Shackan or Shxwha:y or Shw'ow'hamel or Simpcw or Skatin or Skawahlook or Skin Tyee or Skowkale or Skuppah or Skwah or Sliammon or Soowahilie or Spallumcheen or Squiala or Stelat'en or T'it'qet or Tla-o-qui-aht or Tlatlasikwala or Tl'azt'en or Tl'etinqox-t'in or Tlowitsis or Toosey or Toquaht or Tsartlip or Tsawataineuk or Tsawout or "Tsay Keh" or Tseshaht or Tseycum or "Tsi Del Del" or Ts'kw'aylaxw or T'souke or Tzeachten or Uchcklesah or Ulkatcho or "We Wai Kai" or Kwa'Kwa'Ka'Wa'Kw or Xaxli'p or Yaakweakwioose or Yekooche).tw.

7. (Opaskawayak or Peguis or Sagkeeng or Sapotaweyak or "Wuskwi Siphik" or Skownan or Pinaymootang or Kinonjeoshtegon or O-Chi-Chak-Ko-Sipi or Tootinaowaziibeeng or Keeseekoowenin or Waywayseecappo or "Birdtail Sioux" or Canupawakpa or "Dakota Tipi" or "Brokenhead Ojibway" or "Lac Brochet" or "Sayisi Cree" or "Tadoule Lake" or Brochet or O-Pipon-Na-Piwin or "Mathias Colomb" or Pukatawagan or Tataskweyak or Nisichawayasihk or Shamattawa or Bunibonibee or "Manto Sipi" or Wasagamack or Pauingassi).tw.

8. (Montagnais or Maliseet or Naskapi\* or Mi'kmaq or Micmac or "Mic mac" or Migmaw or "Mig maw" or Beothuk\* or Metepenagiag or Buctouche or Esgenoopetitj or Pabineau or Tabusintac or Tobique or Wolastoqiyik).tw.

9. (Esquimau\* or Innu\* or Mikmaq or Micmaw or Sheshiatshiu or Nain or Rigolet or Utshimasset or Makkovik or Nunatsiavut or Urahimassit).tw.

10. (Gwich\* or Aklavik or Behchoko or "Rae Edzo" or "Deh Cho" or Deline or "Fort good hope" or "Fort Liard" or "Fort McPherson" or "Fort Providence" or "Fort Simpson" or "Fort Smith" or Gameti or "Hay River" or "Jean Marie River" or Lutselk'e or "Norman Wells" or Paulatuk or "Sachs Harbour" or "Trout Lake" or Tsiigehtchic or Tuktoyaktuk or Tulita or Ulukhaktok or "Victoria Island" or Whati or Wrigley or Slavey\* or Tliche or Yellowknives or Sahtu).tw.

11. (Autochtone\* or Eskasoni or Paq'tnkek or Glooscap or Acadia or "Gold River" or Horton or Shubenacadie or "Indian Brook" or Wagmatcook or Waycobah or Millbrook or Malagawatch or "Medway River" or Membertou or Merigomish or Musquodoboit or "New Ross" or Pennal or Pomquet or Poonhook or "Sheet Harbour" or "St Croix" or Summerside or Sydney or Truro or We'koqma'q or Wycocomagh or Wildcat or Yarmouth).tw.

12. (Nunavut\* or "Eastern Arctic" or "Alert Bay" or "Alexandra Fiord" or Amadjuak or "Aquiavulavik Point" or "Arctic Bay" or Arviat or "Baffin Island" or "Baker Lake" or "Bathurst Inlet" or "Belcher Islands" or "Bylot Island" or "Cambridge Bay" or Iqaluktuttiaq or "Cape Dorset" or "Cape Dyer" or "Cape Smith" or "Charlton Depot" or "Chesterfield Inlet" or "Clyde River" or "Coral Harbour" or "Craig Harbour" or "Dundas Harbor" or "Ellesmere Island" or Ennadai or "Eskimo Point" or "Fort Conger" or "Fort Hope" or "Fort Ross" or "Gjoa Haven" or "Grise Fiord" or "Hall Beach" or "Hazen Camp" or Igloodik or Ikaluit or Iqaluit or Isachsen or Kekerten or Kimmirut or "King William Island" or Kipisa or Kitikmeot or Kivalliq or Kivitoo or

Kugaaruk or Kugluktuk or "Maguse River" or Nanasivik or "Nottingham Island" or Nuwata or Padlei or "Padloping Island" or Pagnirtung or "Perry Island" or "Pond Inlet" or "Port Burwell" or Qoloqtaaluk or Qikiqtarjuaq or "Rankin Inlet" or "Read Island" or "Repulse Bay" or "Resolute Bay" or "Resolution Island" or Sanikiluaq or Taloyoak or "Tanquary Camp" or Tavani or "Thom Bay" or Umingmaktok or "Wager Bay" or "Whale Cove" or "Eastern Arctic" or Fullerton).tw.

13. (Aamjiwnaang or Pikwakanagan or Animbiigoo or Zaagi?igan or "Wauzhushk Onigum" or Naongashiing or Anishnawbe\* or "Armstrong settlement" or Aroland or Assabaska or "Atikameksheng Anishnawbek" or Attawapiskat or "Aundeck-Omni-Kaning" or Batchewana or "Bearfoot Onondaga" or "Biinjitiwabik Zaaging" or Bimose or "Bingwi Neyaashi" or Bkejwanong or "chapleau cree" or dokis or Eabametoong or "Fox Lake Cree" or "Moravian thames" or Ginoogaming or "Kasabonika Lake" or Kashechewan or Kabapikotawanagag or Keewaytinook or KeeWayWin or "Kiashke Zaaging" or Kitchenuhmaykoosib or "Konadaha Seneca" or Koocheching or Magnetawan or Matachewan or Mattagami or "MacDowell Lake" or M'Chigeeng or Mishkeegogamang or Missanabie or Mitaanjigaming or Stanjikoming or Mocrebec or "Mohawks Akwesasne" or Gibson or "Moose Cree" or Naicatchewenin or Namaygoosisagagun or Naotkamegwanning or Neskantaga or Nibinamik or Nigigoonsiminikaaning or Nipissing or Obadjiwan or Obashkaandagaang or "Washagamis Bay" or "Ochiichagwe Bibigo-ining" or Onigaming or Parmachene or Sabaskong or Sagamok or Shawanaga or Sheguiandah or Sheshegwaning or "Taykwa Tagamou" or Temagami or Wabaseemoong or Wabauskang or "Wabigoon Lake" or Wahgoshig or Wahnapiatae or "Wahta Mohawks" or Wapekeka or Wasauksing or "Wauzhushk Onigum" or Wawakepewin or Webequie or Weenusk or Wikwemikong or Ardoch or Beausoleil or "big grassy" or "Iskatewizaagegan 39 Independent" or beaverhouse or "brunswick house" or "buffalo point" or caldwell or "cat lake" or Couchiching or "Curve Lake" or "deer lake" or delaware or "duck lake" or "Eagle Lake" or Thames or "Fort William" or "Garden River" or "Grassy Narrows" or Hiawatha or "Henvey Inlet" or Hornepayne or "Gull Bay" or "King Fisher" or Lac\* or "Long Lake" or Magnetawan or "Marten Falls" or "Martin Falls" or Mississauga or "New Credit" or "Moose Deer Point" or "Munsee Delaware" or "Muskrat Dam" or "North Caribou Lake" or "North Spirit Lake" or "Northwest Angle" or "Sioux Narrows" or "Pays Plat" or "Pic Moberg" or "Red Rock" or "Sachigo Lake" or "Sandy Lake" or "Savant Lake" or Saugeen or "Seine River" or "Serpent River" or "Shoal Lake" or "Stony Point" or "Stoney Point" or "Grand River Territory" or "Slate Falls" or "Whitefish River" or Whitesand or "Whitewater Lake" or "Wunnumin Lake" or Anishinabe\* or Anishnabe\* or Anishinaabe\* or Cayuga or "golden lake" or beardmore or "Christian island" or "Cedar Point" or morson or "bay of quinte" or "bear island" or "Bearskin Lake" or "whitefish lake" or naughton or "little current" or "Kirkland lake" or "big

island" or macdiarmid or "thunder bay" or wallaceburg or chapleau or leamington or "georgina island" or "Cape Croker" or "Fos lake" or "Chief's point" or "Constance Lake" or "English river" or Rama or "Erie St'Clair" or "Factory Island" or "Flying Post" or "Fort Albany" or "Fort Hope" or "Fort Severn" or "Fort William" or Wiarton or Southampton or Saugeen or Muncy or Calstock or "Fort Frances" or "French River" or Thamesville or Monteville or "Eabamet Lake" or Nipigon or "Georgian Bay" or "Long Lac" or Keene or Pickerel or "Glebe Farm" or "Goulais bay" or "Grey Owen Sound" or "Gros cap" or "Indian river" or "King Fisher Lake" or "Sandy Lake" or "Fort Frances" or "Lac Seul" or "lake Helen" or Hudson or Britt or "Okoki Post" or "Manitou Rapids" or gogama or "McDowell Lake" or "Red Lake" or Wawa or "New Osnaburgh" or "Garden River" or "Blind River" or Hagersville or "Port Perry" or "Moose Factory" or Cornwall or Deseronto or Mactier or Muncey or Delvin or Pawitik or "Whitefish Bay" or "Landsdowne House" or "Summer Beaver" or "Weagamow Lake" or "North Spirit Lake" or "Rainy Lake" or "Rainy River" or "Sioux Narrows" or Keewating or Kenora or "Sault Ste Marie" or "Nestor Falls" or "Heron Bay" or Southwold or "Pays Plat" or Mobert or "Pic River" or "Moon River" or Massey or "Sachigo Lake" or "Savant Lake" or Cutler or Nobel or Sheshegwaning or Kejick or Ohsweken or "Slate Falls" or Cochrane or "Lake Tamagami" or Thessalon or Whitedog or "Ear Falls" or Dryden or Matheson or Bala or Capreol or "Angling Lake" or "Parry Sound" or "Sioux Lookout" or Webequie or Peawanuk or "Birch Island" or Armstrong or Silverwater or "Walpole Island" or Winisk).tw.

14. (Abenaki\* or Abitibiwinni or Akwesasne\* or "Barriere Lake" or Betsiamite\* or Cacouna or Chisasibi or Coucoucache or "Eagle Village" or Eastmain or Essipit\* or Ekuanitshit\* or Gespeg or Gessapegiag\* or Huron-Wendat or "Huronne Wendat" or Kahnawake or Kanesatake or Kawawachikamach\* or Kebaowek or Kipawa or Kitcisakik or "Kitigan Zibi" or "Lac Romanie" or "Lac John" or "Lac Simon" or Listuguj\* or "Long Point First" or Maliotenam or Malecite\* or Mamit at or Mamuitun or Manawan or Mashteuiatsh or Matimekush\* or Matimekosh\* or Mawiami or Mi'gmawei or Mingan or Mistissini\* or Natashquan\* or Nemiscau or Nemaska\* or Obedjiwan or Odanak or Opitciwa\* or dopitciwa\* or "Ouje Bougoumou" or Pakuashipi\* or Pessamit\* or Pikogan or "Rapid Lake" or Schefferville or "Sept Iles" or Takuaiakan or "Uashat Mak" or "Mani-Utenam" or Temiscaming or Timiskaming or Ungava or Uashat or "Unamen Shipu" or "Waban-Aki" or Waskaganish or Waswanipi or Wemindji or Wemotaci or Wendat\* or Wendake or Whapmagoostui or Wolinak or Kitcisakik or "Pakua Shipu" or "Pakua Shipi" or Winneway or "trois rivieres" or "james bay" or "baie james" or Laval or Gatineau or Longueuil or Sherbrooke or Saguenay or Doncaster or Levis or Terrebonne or Mascouche or l?Estrie\* or Lanaudiere or l?Outaouais\* or "Capitale-Nationale" or "Chaudiere-Appalaches" or "Cote-Nord" or Gaspé\* or Mauricie or Monteregie or Laurentides or "Bas-SaintLaurent" or "Saint-Laurent" or Nunavik).tw.

15. (Ahtahkakoop or Asimakaniseekan or "Amisk Lake" or Assiniboine or Beardy or "Big River" or "Birch Portage" or "Bittern Lake" or "Budd's Point" or Mamawetan or "Carry the Kettle" or "Canoe Lake" or "Carrot River" or "Day Star" or "Dipper Rapids" or "Eagles Lake" or "Elak Dase" or "English River" or "Fishing Lake" or "Flying Dust" or "Fond du Lac" or "Four Portages" or "Fox Point" or Gordon or "Grandmother's Bay" or "Hatchet Lake" or Hay or "Ils a la Crosse" or "James Smith" or "Joseph Bighead" or Kawacatoose or Kahkewistahaw or Key or Kinistin or Kinookimaw or Kitsakie or "Knee Lake" or "La Loche" or "La Plonge" or "Lac La Hache" or "Lac La Ronge" or "Little Black Bear" or "Little Bone" or "Little Hills" or "Little Pine" or "Little Red River" or "Lucky Man" or Makaoo or Makaw or "Meadow Lake" or Ministikwan or Minoahchak or "Mirond Lake" or Mistawasis or "Montreal Lake" or Moosomin or "Morin Lake" or "Mosquito-Grizzley Bear's" or Muscowpetung or "Muskeg Lake" or "Muskeg River" or Muskoday or Muskowekwan or Nekaneet or "New Thunderchild" or "Cypress Health" or "Ocean Man" or Ochapowace or Okanese or Okemasis or "Old Fort" or "One Arrow" or "Onion Lake" or Opawakoscikan or Peepeekisis or "Pelican Lake" or "Pelican Narrows" or "Peter Ballantyne" or "Peter Pond" or "Pheasant Rump" or Piapot or "Potato River" or Poundmaker or "Primeau Lake" or "Red Earth" OR Red Pheasant OR Sakimay OR Seekaskootch OR Shesheep OR Standing Buffalo OR Starblanket OR Tumor Lake OR Wahpeton OR Wapachewanak OR Wa-Pii OR 'Moos-Toosis" or Waterhen or "Willow Bunch" or Witchekan or "Wood Mountain" or Yellowquill or "Yellow Quill" or "Buffalo River" or "Island Lake" or "Lean Man" or "Pine Bluff" or "Sandy Narrows" or Southend or Stanley or Sturgeon or "Sucker River" or Sweetgrass or "White Bear" or "White Cap" or "Woody Lake" or Estevan or "Moose Jaw" or Lloydminster or "Swift Current").tw.

16. (Champagne or Aishihik or Ehdiitat or "Nacho Nyak Dun" or "Little Salmon" or Carmacks or Nihtat or Selkirk or "Ta'an Kwach'an" or Tetlitn or "Tr'ondek Hwech'in" or "White River" or Vuntut or Denesuline or "MacKenzie Valley" or "Old Crow" or "Upper Liard" or "Eagle Plains" or "Keno City" or Carcross or Teslin or "Fort Selkirk" or "Haines Junction" or "Dawson City" or "Beaver Creek" or Pelly or "Destruction Bay" or "Watson Lake" or Gwitchin).tw.

17. ("Aakom Kiyii" or "Alexis Cardinal River" or "Alexis Elk River" or "Alexis Nakota Sioux" or "Allison Bay" or "Assineau River" or Atikameg or "Athabasca Chipweyan" or Beaver or "Beaver Lake Cree" or Bears paw or "Beaver Ranch" or "Bigstone Cree" or "Bistcho Lake" or "Blood Tribe" or "Cadotte Lake" or "Carajou Settlement" or Chateh or Chiniki or Prairie or "Cold Lake" or "Desmarais Settlement" or "Dog Head" or Driftpile or "East Prairie" or "Elizabeth Settlement" or Enilda or "Enoch Cree" or Duncans or "Ermineskin Frog Lake" or "Garden Creek" or "Goodfish Lake" or "Gregoire Lake" or Grouard or "Heart Lake" or Hobbema or Hokedhe or "Horse Lake\*" or "Janvier Health" or "Jere Ghalil" or "Jean Dor" or "John Dor" or Kainai or Kainaa or Kapaweno or "Kee Tas Kee Now" or Kehewin or "Ki Tue" or Kapaweno

or Kikino or Kinuso or "Jackfish Point" or "Little Buffalo" or "Little Red River Cree" or "Loon Prairie" or "Louis Bull" or "Lubicon Lake" or "Maggie Willier" or Maskwacis or "Meander Health" or Mikisew or Nakota or Nakoda or "Namur Lake" or OChiese or "Old Fort" or "Paddle Prairie" or "Paul Band" or Paul or "Peace Point" or "Peavine Settlement" or Peigan or "Peerless Lake" or "Peerless Trout" or Piikani or Pikuni or Pikani or Puskiakiwenin or "Red Earth Creek" or "Saddle Lake" or "Samson Cree" or Sarcee or "Sawridge Band" or Siksika or Siksikawa or "Sao-kitapiiksi" or Stoney or "Stoney Tribe" or "St Isadore" or "Sturgeon Lake Cree" or Tasttine or Tallcree or "Tall Cree" or Thabacha or Thebathi or "Tsuu Tina" or "Tsu Tue" or "Tsu Kadhe" or Unipouheos or Utikoomak or Wabasca or "Wesley Band" or Alexander or "Blue Quill\*" or "Fort McKay" or "Fort McMurray" or "Loon River" or "Smiths Landing" or "Sucker Creek" or Sunchild or "Swan River" or Michif or Brownvale or "Fort McMurray Hythe" or "Slave Lake" or Valleyview or "Fort Vermilion" or Morinville or Glenevis or "Lac La Biche" or "Rocky Mountain House" or Duffield or Brocket or Morley or Whitecourt or "Amber River" or "Big Horn" or "Buck Lake" or "Charles Lake" or "Collin Lake" or "Cornwall Lake" or "Cowper Lake" or "Devils Gate" or "Eden Valley" or "Fox Lake" or "Little Red River" or "Hay Lake" or "Lesser Slave Lake" or Bonneyville or "Loon Lake" or Wetaskiwin or "Pigeon Lake" or "Lake Athabasca" or "Fort McLeod" or Barrhead or "Stony Plain" or "Sturgeon Lake" or "High Prairie" or "Swampy Lake" or "Upper Hay River Wabamun" or "Winefred Lake" or Nordegg or "Boyer River" or "Calling Lake" or Berwyn or "Black Diamond" or "Fishing Lake" or "Gift Lake" or Kananaskis or "Medicine Hat" or Ponoka or "Stand Off").tw.

18. (Qikqtaalumiut\* or Uqqurmiut\* or Nugumiut\* or Akuliarmiut\* or Qaumauangmiut\* or Sikusilaamiut\* or Oqomiut\* or Talirpingmiut\* or Qingaumiut\* or Kingnaitmiut\* or Saumingmiut\* or Itivimiut\* or Sanikiluarmiut\* or Tarramiut\* or Netsilik or Tanana\* or "Tli Cho" or Yukon or Whitehorse or Inuvik or "Coal Harbour" or "Repulse Bay" or Talouyoak or Nanisivik or "Devon Island" or Baffin Island or Tsilgehtchic or "Colville Lake" or Behochoko or Yellowknife).tw.

19. (Gitsxan or Kwakwaka'wakw or "Nuu chah nulth" or Wet'suwet'en or "Dunne-za" or Stl'atlmc or "Sec wepmc" or Han or Ojibwa or Potawatomi or Passamaquoddy or Haudenosaunee or Mohawks or Onodaga or Seneca or Tuscarora or Wyandot or NunatuKavut).tw.

20. 1 or 2 or 3 or 4 or 5 or 6 or 7 or 8 or 9 or 10 or 11 or 12 or 13 or 14 or 15 or 16 or 17 or 18 or 19

21. (Health adj1 (education\* or method\* or knowledge or attitude\* or practice\*)).tw.

22. (Patient adj1 (education\* or teaching\*)).tw.

23. Program Development/mt [Methods]

24. Health Education/mt [Methods]



25. Health Knowledge, Attitudes, Practice/eh [Ethnology]
26. Patient Education as Topic/mt [Methods]
27. Teaching Materials/st [Standards]
28. (teaching adj1 (material\* or program\* or "development program\*"). tw.
29. ("educational tool\*" or "decision aid\*" or "decision support\*" or "shared decision" or "SDM Tool" or "integrated program\*" or "program plan\*").tw.
30. Audiovisual Aids/st [Standards]
31. Patient Education as Topic/mt [Methods]
32. ("Audiovisual aid\*" or video\*) tw.
33. Clinical Decision-Making/mt [Methods]
34. Program Evaluation/mt [Methods]
35. Decision Support Techniques/
36. Decision Support Systems, Clinical/st [Standards]
37. exp National Health Programs/mt, st [Methods, Standards]
38. Knowledge Translation/
39. Pamphlets/
40. (pamphlet\* or booklet\* or brochure\*).tw.
41. 21 or 22 or 23 or 24 or 25 or 26 or 27 or 28 or 29 or 30 or 31 or 32 or 33 or 34 or 35 or 36 or 37 or 38 or 39 or 40
42. Kidney Failure, Chronic/di, eh, mo, pp, th [Diagnosis, Ethnology, Mortality, Physiopathology, Therapy]
43. renal replacement therapy/ or renal dialysis/ or hemodiafiltration/ or hemodialysis, home/ or peritoneal dialysis/ or kidney transplantation/
44. (Dialysis or "end stage kidney diseas\*" or "end stage renal diseas\*" or "chronic kidney diseas\*" or nephrogenesis or kidney\* or hemodialysis or "renal transplant\*").tw.
45. exp Kidney/
46. exp Renal Insufficiency, Chronic/
47. exp Urologic Diseases/dh, dt, et, ge, in, pp, pc, rh, su, th [Diet Therapy, Drug Therapy, Etiology, Genetics, Injuries, Physiopathology, Prevention & Control, Rehabilitation, Surgery, Therapy]
48. ((renal or kidney) adj1 (diseas\* or dialysis)).tw.
49. exp Peritoneal Dialysis/
50. Hepatitis C, Chronic/ or Hepatitis C/ or HIV Infections/
51. exp Hypertension/co, di, dh, dt, pp, pc, rh, su, th, [Complications, Diagnosis, Diet Therapy, Drug Therapy, Physiopathology, Prevention & Control, Rehabilitation, Therapy]

52. exp Diabetes Mellitus/di, dh, dt, ed, pp, pc, su, th.[Diagnosis, Diet Therapy, Drug Therapy, Education, Physiopathology, Prevention & Control, Therapy]
53. exp Cardiovascular Diseases/dh, dt, pp, pc, su, th [Diet Therapy, Drug Therapy, Physiopathology, Prevention & Control, Therapy]
54. 42 or 43 or 44 or 45 or 46 or 47 or 48 or 49 or 50 or 51 or 52 or 53
55. (Indigenous or aborigin\* or "First nation" or Native or tribe).tw.
56. 20 and 55
57. 41 and 54 and 56
58. limit 57 to (english language and yr="1997 -Current")
59. remove duplicates from 58
